# Supplementary material for: OEI800 polyconjugates linked with ketalized glycolic acid for use as gene vectors
Source: Royal Society of Chemistry journal article supplement (doi:10.1039/c1jm12849c), 2011-01-01
Supplement: c1jm12849c.pdf [file c1jm12849c.pdf]

## Supporting Information

*of*

# OEI800 Polyconjugates Linked with Ketalized Glycolic Acid for Use as Gene Vectors

*Xiao-hua Luo, Chen-Wei Liu, Ze-yong Li, Si-yong Qin, Jun Feng<sup>\*</sup>, Xian-zheng Zhang,*

*Ren-xi Zhuo*

---

<sup>\*</sup> Key Laboratory of Biomedical Polymers (The Ministry of Education), Department of Chemistry, Wuhan University, Wuhan, 430072, China. Tel.: + 86 27 6875 4509, Fax: + 86 27 6875 4509. *E-mail address:* fengjun@whu.edu.cn (J. Feng)

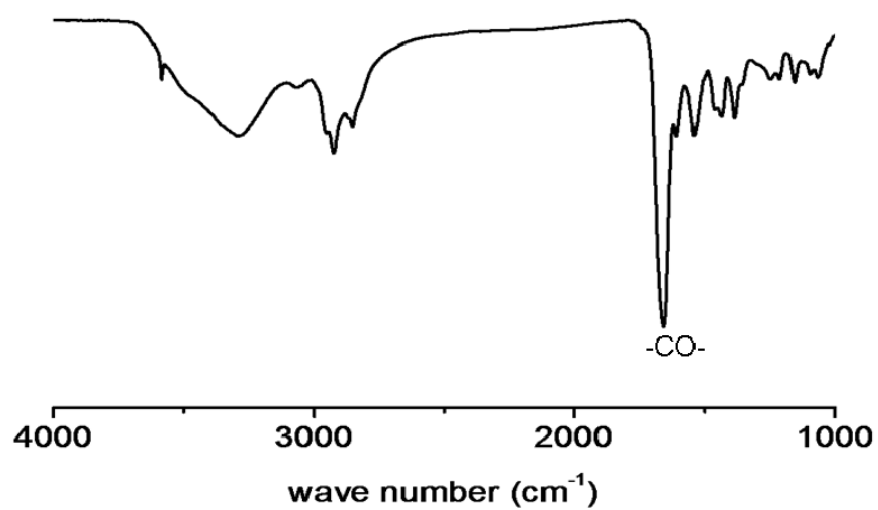

**Fig. S1** FT-IR spectrum of OEI-GK (1:1).
